# Supplementary material for: Human skeletal myopathy myosin mutations disrupt myosin head sequestration
Source: PubMed Central journal article supplement (PMC10721271; doi:10.1172/jci.insight.172322), 2023-11-08
Supplement: jciinsight-8-172322-s120.pdf [file jciinsight-8-172322-s120.pdf]

Supplementary information for:

## Human Skeletal myopathy myosin mutations disrupt myosin head sequestration

Glenn Carrington, Abbi Hau, Sarah Kosta, Hannah F. Dugdale, Francesco Muntoni, Adele D'Amico, Peter Van den Bergh, Norma B. Romero, Edoardo Malfatti, Juan Jesus Vilchez, Anders Oldfors, Sander Pajusalu, Katrin Öunap, Marta Giralt-Pujol, Edmar Zanoteli, Kenneth S. Campbell, Hiroyuki Iwamoto, Michelle Peckham\*, Julien Ochala\*

\*Corresponding authors: [julien.ochala@sund.ku.dk](mailto:julien.ochala@sund.ku.dk) and [M.Peckham@leeds.ac.uk](mailto:M.Peckham@leeds.ac.uk)

**Table S1**

Patient and control muscle biopsy samples used.

| Age (years)     | Gender (M/F) | Mutation                | Amino acid change | Heptad position | Disease                             | Source                |
|-----------------|--------------|-------------------------|-------------------|-----------------|-------------------------------------|-----------------------|
| <i>MYH7</i>     |              |                         |                   |                 |                                     |                       |
| 15              | F            | c.4319delITGC           | p.A1440del        | <i>b</i>        | Laing Distal Myopathy               | London, UK            |
| 16              | F            | c.4475T>C               | p.L1492P          | <i>e</i>        | Laing Distal Myopathy               | Rome, Italy           |
| 26              | M            | c.4520-15_4520-9del     | p.E1507del        | <i>f</i>        | Congenital Myopathy                 | Paris, France         |
| 68              | F            | c.4522_4524del          | p.E1508del        | <i>g</i>        | Laing Distal Myopathy               | Brussels, Belgium     |
| 44              | F            | c.4828G>A               | p.E1610K          | <i>c</i>        | Congenital Myopathy                 | Paris, France         |
| 48              | F            | c.4906G>C               | p.A1636P          | <i>g</i>        | Laing Distal Myopathy               | Valencia, Spain       |
| 49              | F            | c.<br>c.5005_5007delGAG | p.E1669del        | <i>f</i>        | Laing Distal Myopathy               | Gothenburg,<br>Sweden |
| 31              | F            | c.5292_5294delAGA       | p.K1729del        | <i>c</i>        | Laing Distal Myopathy               | Valencia, Spain       |
| 42              | M            | c.5292_5294delAGA       | p.K1729del        | <i>c</i>        | Laing Distal Myopathy               | Valencia, Spain       |
| 48              | F            | c.5292_5294delAGA       | p.K1729del        | <i>c</i>        | Laing Distal Myopathy               | Valencia, Spain       |
| 57              | M            | c.5292_5294delAGA       | p.K1729del        | <i>c</i>        | Laing Distal Myopathy               | Valencia, Spain       |
| 60              | F            | c.5292_5294delAGA       | p.K1729del        | <i>c</i>        | Laing Distal Myopathy               | Valencia, Spain       |
| 60              | F            | c.5292_5294delAGA       | p.K1729del        | <i>c</i>        | Laing Distal Myopathy               | Valencia, Spain       |
| 62              | F            | c.5292_5294delAGA       | p.K1729del        | <i>c</i>        | Laing Distal Myopathy               | Valencia, Spain       |
| 65              | F            | c.5292_5294delAGA       | p.K1729del        | <i>c</i>        | Laing Distal Myopathy               | Valencia, Spain       |
| 74              | M            | c.5292_5294delAGA       | p.K1729del        | <i>c</i>        | Laing Distal Myopathy               | Valencia, Spain       |
| 57              | M            | c.5533C>T               | p.R1845W          | <i>f</i>        | Myosin Storage Myopathy             | Valencia, Spain       |
| <i>MYH2</i>     |              |                         |                   |                 |                                     |                       |
| 1               | M            | c.5609T>C               | p.L1870P          | <i>d</i>        | Congenital Fibre Type Disproportion | Tartu, Estonia        |
| <i>Controls</i> |              |                         |                   |                 |                                     |                       |
| 10              | M            | -                       | -                 | -               | -                                   | Sao Paulo, Brazil     |
| 20              | M            | -                       | -                 | -               | -                                   | London, UK            |
| 20              | F            | -                       | -                 | -               | -                                   | Sao Paulo, Brazil     |
| 25              | F            | -                       | -                 | -               | -                                   | London, UK            |
| 32              | M            | -                       | -                 | -               | -                                   | Copenhagen, DK        |
| 54              | F            | -                       | -                 | -               | -                                   | Copenhagen, DK        |
| 71              | F            | -                       | -                 | -               | -                                   | Copenhagen, DK        |

**Table S2**

The FiberSim 2.1.0 software has been thoroughly described (1). Briefly, FiberSim tracks the position and status of actin and myosin molecules within a network of compliant thick and thin filaments. For all the simulations, the half-sarcomere lattice was composed of 100 thick filaments and 200 thin filaments. These filaments were arranged in a hexagonal lattice to mimic the architecture of human myofibres. Filaments located at the edge of the lattice were “mirrored” on the opposite side to minimize edge effects (2). Each thin filament was composed of two actin strands. Each strand contained 27 regulatory units, and each regulatory unit contained 7 binding sites. Each thick filament was composed of 54 myosin crowns with each crown consisting of 3 pairs of myosin dimers. Each binding site on actin could be in an inactive (unavailable for myosin binding) or active (available for myosin binding) state. All 7 binding sites from a regulatory unit switched simultaneously between those two states, depending on the  $\text{Ca}^{2+}$  concentration and on the transition rate constants  $k_{\text{on}}$  and  $k_{\text{off}}$  which we set. A cooperative mechanism was also implemented such that the transition probability for a regulatory unit was influenced by the states of its neighbours. Finally, a regulatory unit was prevented from deactivating if one or more myosin head(s) were bound. Although this model only has two explicit thin filament states, it mimics an important feature of the three state thin filament model described by McKillop and Geeves (3) in that bound myosin heads inhibited relaxation. Heads in SRX switched to DRX at a rate  $k_1$  that is assumed to be force-dependent (1). DRX heads could then attach to available binding sites on actin. The attachment and detachment rates depended on  $x$ , where  $x$  is the distance to the binding site measured parallel to the filaments. The rate functions are provided in Table S2. The detachment rate function ( $k_4$ ) was updated for the present study so that it had an exponential strain-dependence similar to that measured for single myosin heads via optical trapping (4). Model parameters were chosen to reproduce physiological values for: maximal isometric force ( $\approx 150$ -200 kPa at a sarcomere length of 2.2  $\mu\text{m}$ ), passive force ( $\approx 1$ -2% of the maximal isometric force) and  $\text{Ca}^{2+}$  sensitivity ( $\text{pCa}_{50} \approx 5.7$ ). Here are the parameters used.

| Actin kinetics                                                                                                                                        | Parameters                                                                                                                                                    |
|-------------------------------------------------------------------------------------------------------------------------------------------------------|---------------------------------------------------------------------------------------------------------------------------------------------------------------|
| $k_{\text{activate}} = [\text{Ca}^{2+}] \cdot k_{\text{on}} \cdot (1 + n \cdot Y_{\text{coop}})$                                                      | $k_{\text{on}} = 2 \cdot 10^7 \text{ M} \cdot \text{s}^{-1}$<br>$Y_{\text{coop}} = 10$<br>$n = 0, 1 \text{ or } 2$ (# of active neighboring RUs)              |
| $k_{\text{deactivate}} = k_{\text{off}} \cdot (1 + [2 - n] \cdot Y_{\text{coop}})$                                                                    | $k_{\text{off}} = 100 \text{ s}^{-1}$                                                                                                                         |
| Myosin kinetics                                                                                                                                       | Parameters                                                                                                                                                    |
| $k_1 = k_{1,0} + k_{1,f} \cdot \text{node force}$                                                                                                     | $k_{1,0} = \begin{cases} 45 \text{ s}^{-1} & \text{for control} \\ 100 \text{ s}^{-1} & \text{for mutation} \end{cases}$<br>$k_{1,f} = 100 \text{ nN s}^{-1}$ |
| $k_2 = \text{constant}$                                                                                                                               | $k_2 = 100 \text{ s}^{-1}$                                                                                                                                    |
| $k_3 = k_{3,0} \exp\left(-\frac{k_{\text{cb}} x^2}{2 k_{\text{B}} T}\right)$                                                                          | $k_{3,0} = 25 \text{ s}^{-1}$<br>$k_{\text{cb}} = 10^{-3} \text{ nN} \cdot \text{nm}^{-1}$<br>$T = 310 \text{ K}$                                             |
| $k_4 = \begin{cases} k_{4,0} \exp(-k_{4,1}(x + x_{\text{ps}})) & \text{if } x < x_{\text{wall}} \\ 1000 & \text{if } x > x_{\text{wall}} \end{cases}$ | $k_{4,0} = 150 \text{ s}^{-1}$<br>$k_{4,1} = 0.25 \text{ nm}^{-1}$<br>$x_{\text{ps}} = 5 \text{ nm}$<br>$x_{\text{wall}} = 8 \text{ nm}$                      |

**Table S3**

Summary of the results from Figures 2 to 5. Mean values are presented (ND – not done, NF – no filaments).

| <b>Construct/mutation</b> | <b>Helicity (%)</b> | <b>T<sub>m</sub> (°C)</b> | <b>Length (nm)<br/>Homozygous<br/>(heterozygous)</b> | <b>Width (nm)<br/>homozygous<br/>(heterozygous)</b> | <b>Peak-Peak<br/>GFP-MHC (μm)</b> |
|---------------------------|---------------------|---------------------------|------------------------------------------------------|-----------------------------------------------------|-----------------------------------|
| MYH7 WT                   | 100                 | 47.0                      | 313                                                  | 18                                                  | 0.98                              |
| A1440del                  | 95                  | 49.5                      | 330 (520)                                            | 21 (20)                                             | 0.95                              |
| L1492P                    | 70                  | 41.6                      | NF (328)                                             | NF (21)                                             | 0.83                              |
| E1507del                  | 89                  | 46.9                      | 377 (507)                                            | 24 (22)                                             | ND                                |
| E1508del                  | 94                  | 45.5                      | 234 (370)                                            | 22 (18)                                             | 0.83                              |
| E1610K                    | 102                 | 51.3                      | 566 (585)                                            | 23 (14)                                             | 0.77                              |
| A1636P                    | 83                  | 46.4                      | NF (185)                                             | NF (23)                                             | ND                                |
| E1669del                  | 85                  | 46.7                      | 430 (355)                                            | 22 (22)                                             | 0.76                              |
| K1729del                  | 82                  | 44.7                      | 297 (350)                                            | 29 (21)                                             | 0.81                              |
| R1845W                    | 93                  | 50.3                      | 494 (701)                                            | 25 (20)                                             | 0.82                              |
| MYH2 WT                   | 100                 | 48.3                      | 380                                                  | 19 (10)                                             | 0.64                              |
| L1870P                    | 84                  | 45.3                      | 215 (370)                                            | 19                                                  | ND                                |

**Table S4**

Summary of the results from Figures 6 to 7. Mean values are presented.

| Mutation           | P1 (%) | P2 (%) | T1 (sec) | T2 (sec) | Specific force (kPa) | pCa <sub>50</sub> |
|--------------------|--------|--------|----------|----------|----------------------|-------------------|
| β/slow myofibres   |        |        |          |          |                      |                   |
| Control            | 47     | 53     | 17       | 81       | 148                  | 5.80              |
| A1440del           | 58     | 42     | 16       | 79       | 158                  | 5.83              |
| L1492P             | 59     | 41     | 14       | 80       | 138                  | 5.73              |
| E1507del           | 52     | 48     | 15       | 89       | 159                  | 5.76              |
| E1508del           | 58     | 42     | 16       | 88       | 148                  | 5.78              |
| E1610K             | 60     | 40     | 16       | 90       | 157                  | 5.81              |
| A1636P             | 59     | 41     | 12       | 84       | 148                  | 5.84              |
| E1669del           | 63     | 37     | 16       | 71       | 139                  | 5.66              |
| K1729del           | 60     | 40     | 15       | 82       | 141                  | 5.85              |
| R1845W             | 59     | 41     | 16       | 77       | 164                  | 5.89              |
| L1870P             | 44     | 56     | 15       | 60       | 155                  | 5.75              |
| Type IIA myofibres |        |        |          |          |                      |                   |
| Control            | 49     | 51     | 15       | 87       | 145                  | 5.79              |
| A1440del           | 52     | 48     | 13       | 84       | 156                  | 5.76              |
| L1492P             | 44     | 56     | 18       | 79       | 142                  | 5.75              |
| E1507del           | 46     | 54     | 14       | 99       | 146                  | 5.89              |
| E1508del           | 43     | 57     | 16       | 83       | 131                  | 5.87              |
| E1610K             | 46     | 53     | 16       | 74       | 129                  | 5.74              |
| A1636P             | 44     | 56     | 13       | 71       | 151                  | 5.66              |
| E1669del           | 42     | 58     | 17       | 97       | 147                  | 5.89              |
| K1729del           | 46     | 54     | 16       | 91       | 145                  | 5.80              |
| R1845W             | 47     | 53     | 15       | 98       | 139                  | 5.77              |
| L1870P             | 64     | 36     | 13       | 90       | 131                  | 5.79              |

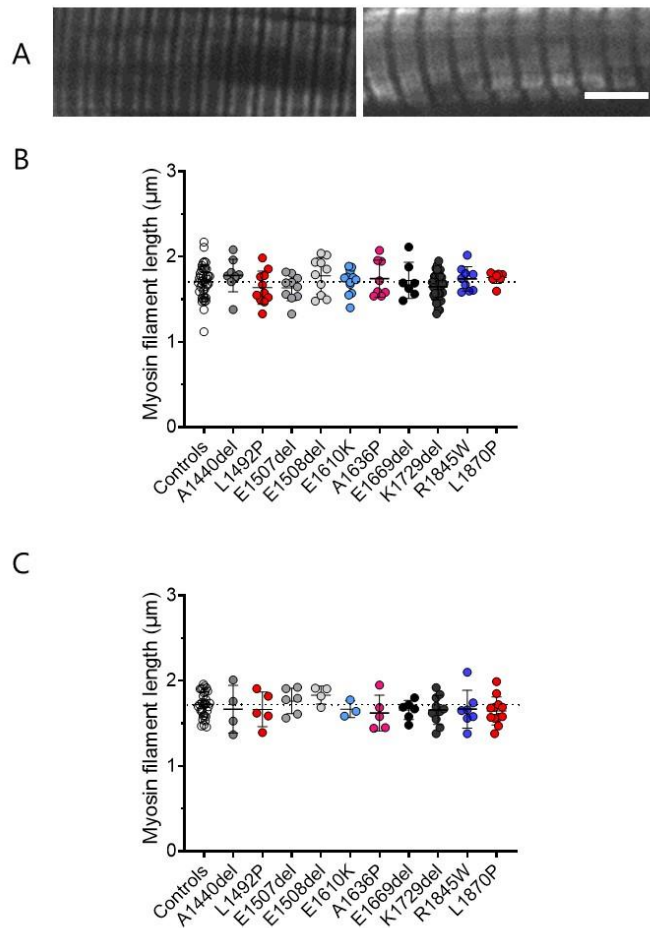

### **Figure S1**

**Myosin filament length.** Distributed deconvolution (DDecon) was applied from the acquired images with a specific plugin for ImageJ (National Institutes of Health, Bethesda, MD) (5). Note that DDecon is a super-resolution light microscopy technique that allows the computation of filament lengths with a precision of 10.00–20.00 nm (5). All line scans were background-corrected. Distances (and myosin filament lengths) were finally calculated by converting pixel sizes into micrometer using the magnification factor for each image (5). **A.** displays two typical images obtained with confocal microscopy using the A4.951 antibody and allowing the measurement of myosin filament lengths (scale bar: 5 µm). **B.** shows measurements for individual myofibres expressing the β/slow myosin heavy chain isoform in every single subject (n=161) whilst **C** has data relating to muscle fibres expressing the type IIA myosin heavy chain isoform (n=94). Means and standard deviations also appear on these graphs. The one-way ANOVA with Dunnett's test post-correction was used but no significant differences were seen.

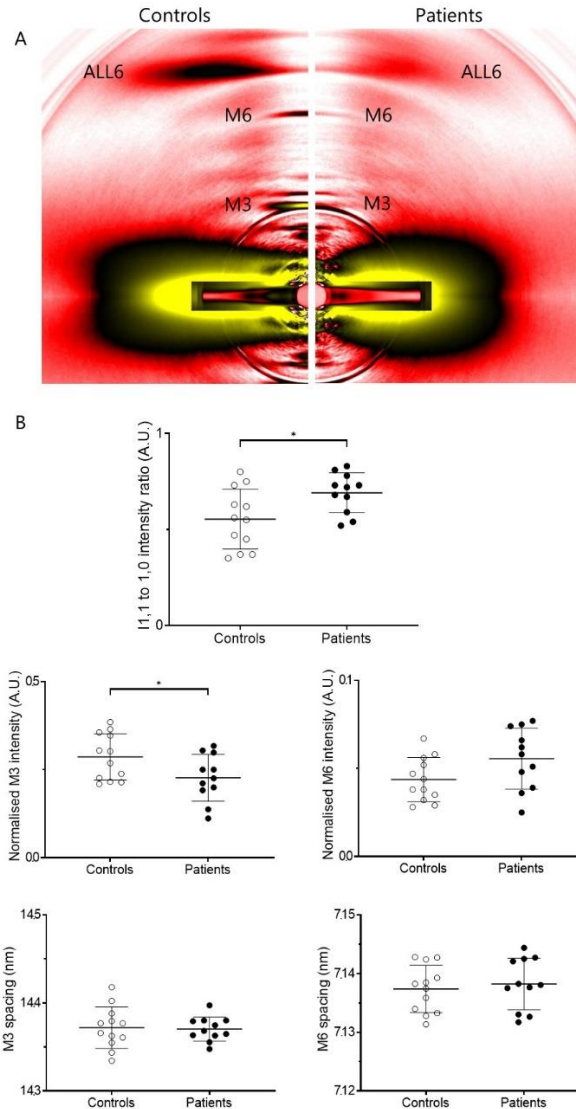

### **Figure S2**

**Myosin head order.** **A.** depicts typical X-ray diffraction patterns. **B.** shows equatorial intensity ratio (IR) and the main myosin meridional reflections, namely M3 and M6 (M3 and M6 intensities were normalised to the 6<sup>th</sup> actin-layer line, ALL6). To ensure reliable results and avoid misinterpretation, we pooled all the patients' data (n=11) together and compared these to images acquired for controls (n=12). Means and standard deviations also appear on these graphs. \* The one-way ANOVA with Dunnett's test post-correction was used with  $p < 0.05$ .

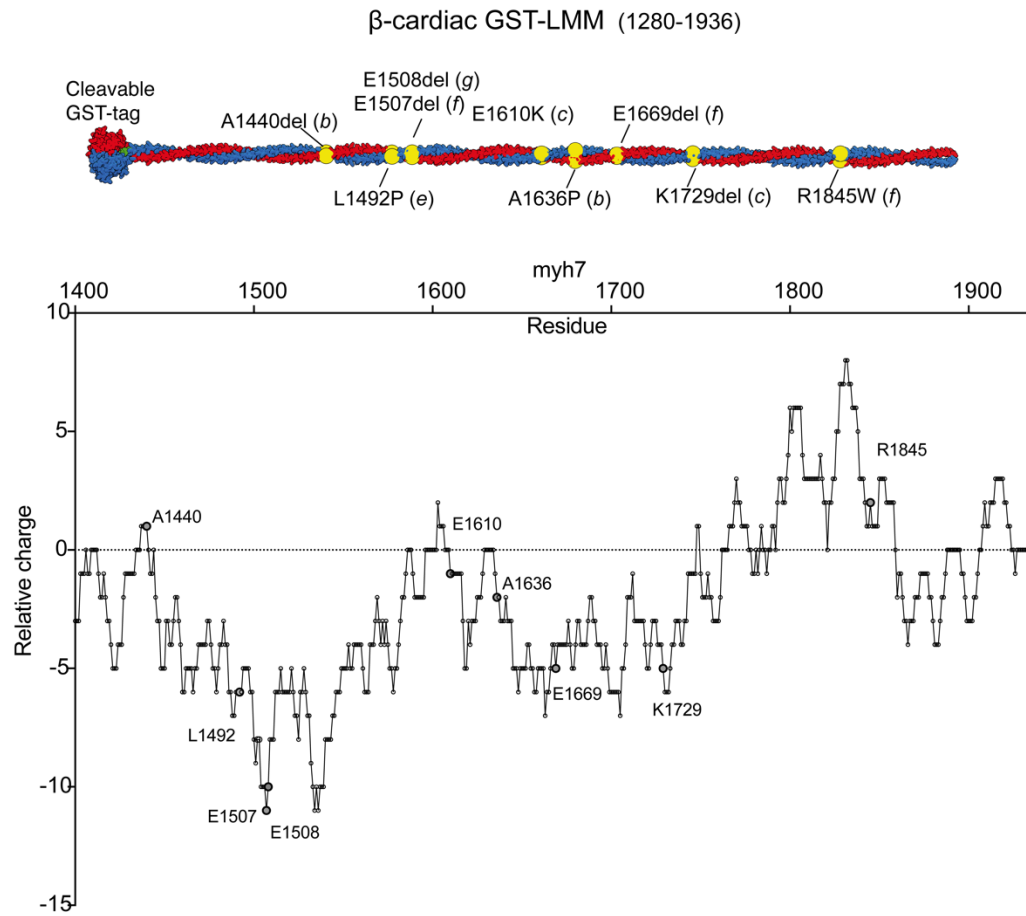

**Figure S3**

**Charge plot of MYH7 LMM region.** The diagram shows the positions of mutations in GST-LMM, and the plot shows the alternating regions of positive and negative charges important for filament formation, together with the positions of the mutations.



**Figure S4**

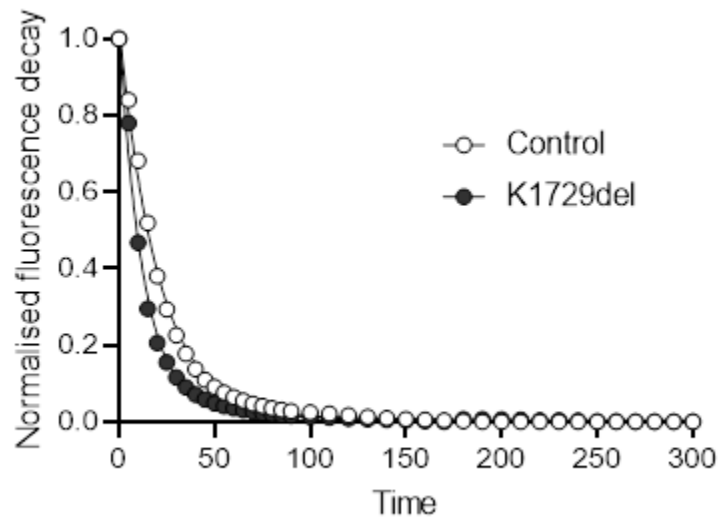

**Figure S4**

**Fluorescent decay with Mant-ATP.** Typical Mant-ATP chase experimental data show exponential decays for muscle fibres from one control and one patient (K1729del).

## **References**

1. Kosta S, Colli D, Ye Q, and Campbell KS. FiberSim: A flexible open-source model of myofilament-level contraction. *Biophys J.* 2022;121(2):175-82.
2. Tanner BC, Daniel TL, and Regnier M. Sarcomere lattice geometry influences cooperative myosin binding in muscle. *PLoS Comput Biol.* 2007;3(7):e115.
3. McKillop DF, and Geeves MA. Regulation of the interaction between actin and myosin subfragment 1: evidence for three states of the thin filament. *Biophys J.* 1993;65(2):693-701.
4. Veigel C, Molloy JE, Schmitz S, and Kendrick-Jones J. Load-dependent kinetics of force production by smooth muscle myosin measured with optical tweezers. *Nat Cell Biol.* 2003;5(11):980-6.
5. Ochala J, Gokhin DS, Penisson-Besnier I, Quijano-Roy S, Monnier N, Lunardi J, et al. Congenital myopathy-causing tropomyosin mutations induce thin filament dysfunction via distinct physiological mechanisms. *Hum Mol Genet.* 2012;21(20):4473-85.
